# Supplementary material
Source: PubMed Central journal article supplement (PMC3035080)

**Figure S1. CXCL12 induces increased and prolonged ERK activation in ZAP-70+ CLL cells. The same data are shown as in Figure 2 from ZAP-70- CLL samples (n=10) and ZAP-70+ CLL samples (n=7), showing individual patient responses; each line represents one patient sample measured over time.**

**Figure S2. CXCL12 induces pronounced MEK activation in ZAP-70+ CLL cells. Depicted are the same data as in Figure 3 showing the individual patient responses; each line represents one patient sample measured over time (n= 8 for ZAP-70+ and n=7 for ZAP-70-).**

**Figure S3. Amplitude of pMEK and pERK responses to CXCL12 based on the fraction of ZAP-70+ CLL cells in the patient samples. Shown are levels of pMEK and pERK using data shown in Figures 2B and 3, where the samples were divided based on the 20% cut-off. Here the samples were divided into 4 groups based on the percentage of ZAP-70+ cells to examine if there is a correlation between the percentage of ZAP-70+ and the phosphorylation level.**

**Figure S4. Sorafenib causes increased apoptosis in ZAP-70+ CLL cells. Depicted are the same data as in Figure 5B showing individual patient responses.**

**Figure S5. Sorafenib cause apoptosis of CLL cells in presence of NLCs. Depicted are the same data as in Figure 5C showing individual patient responses.**



Figure S2

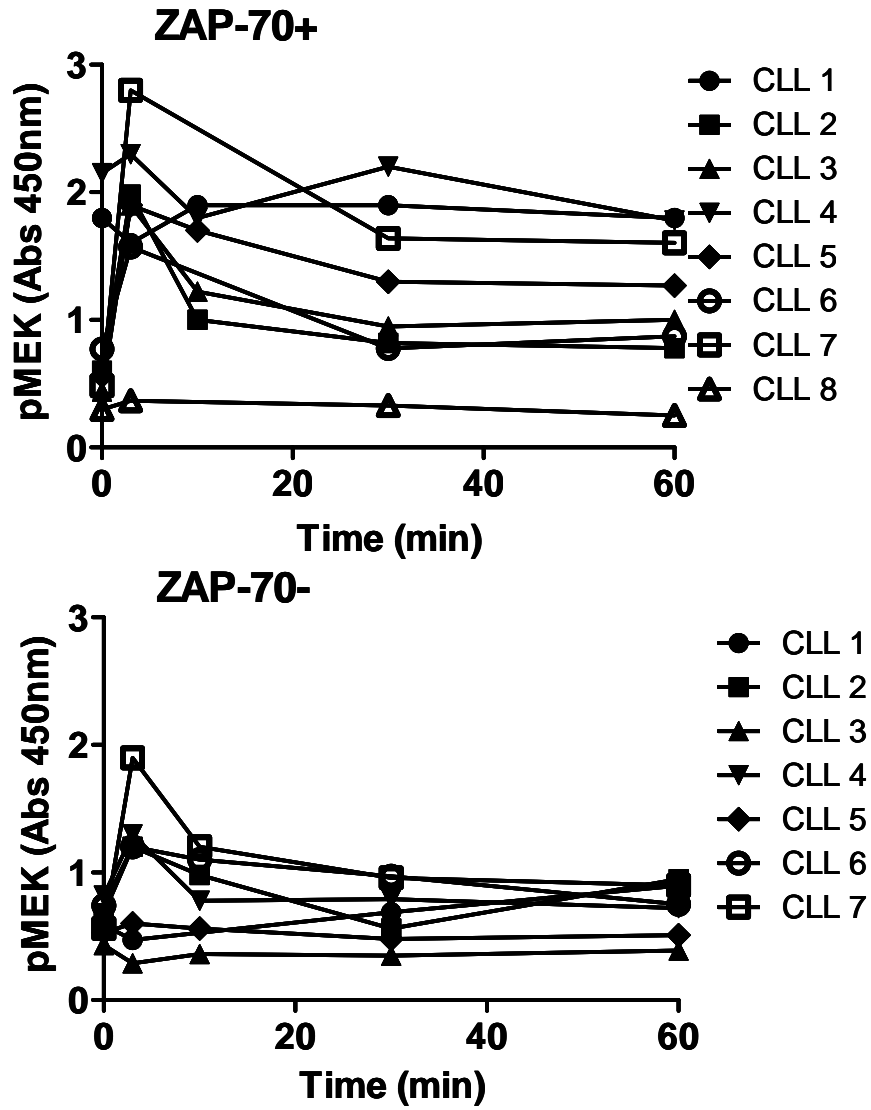

Figure S3

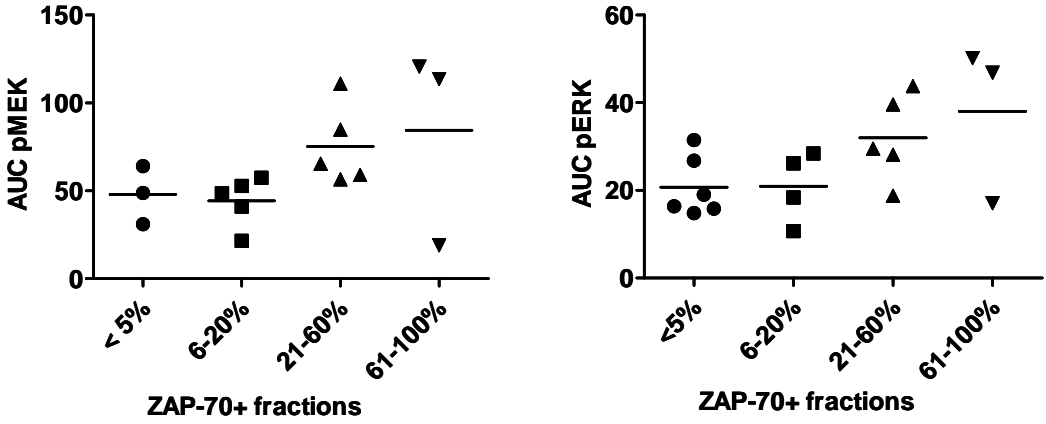

Figure S4

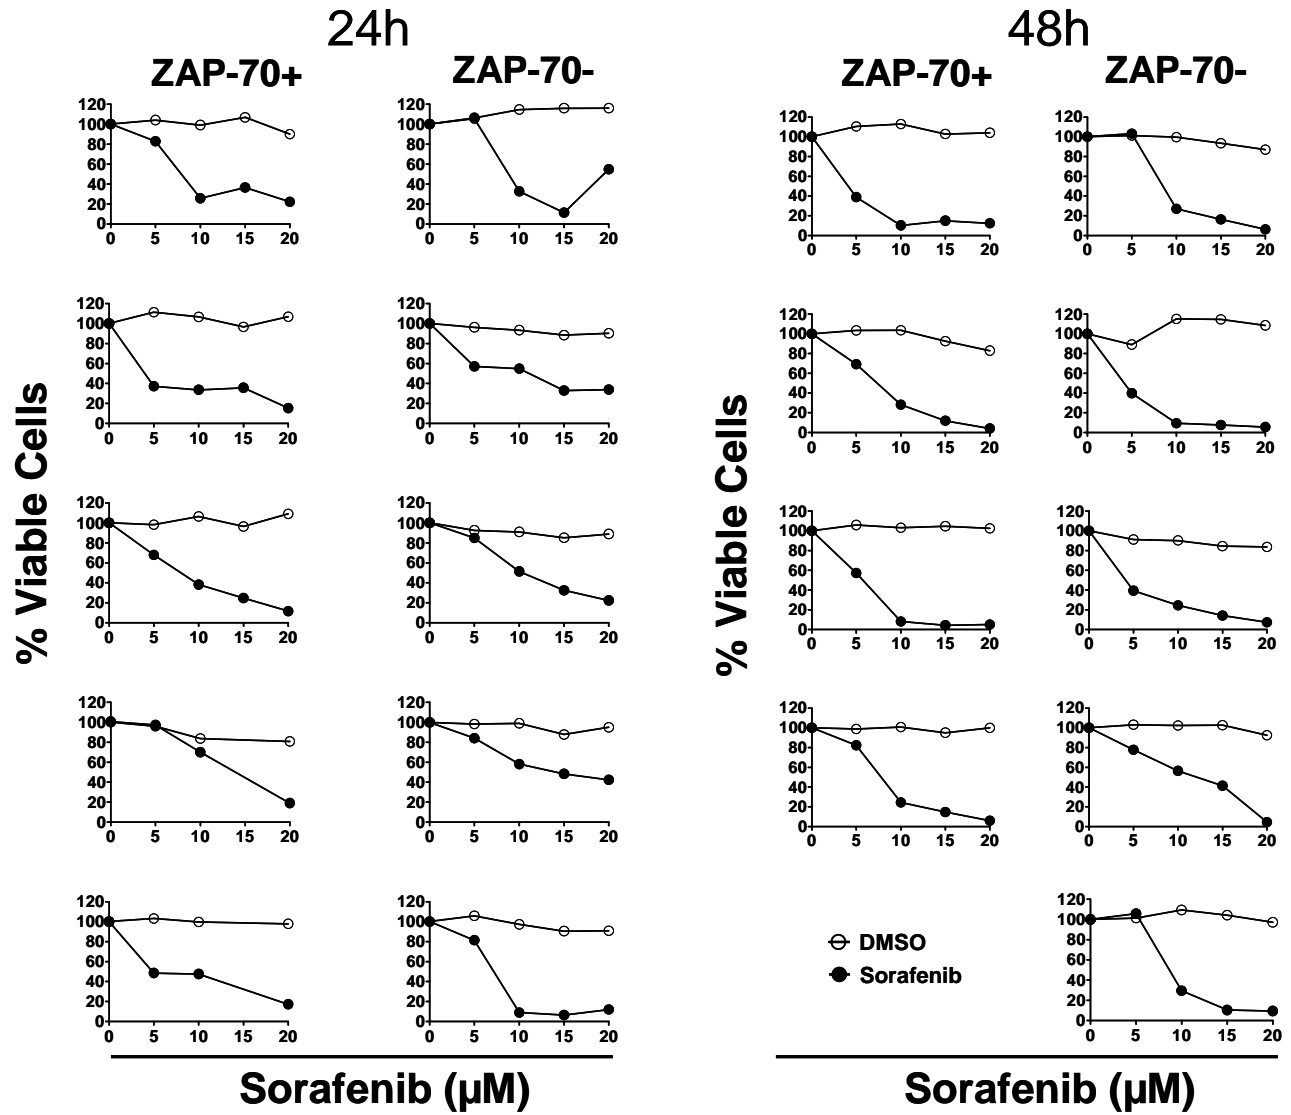

Figure S5

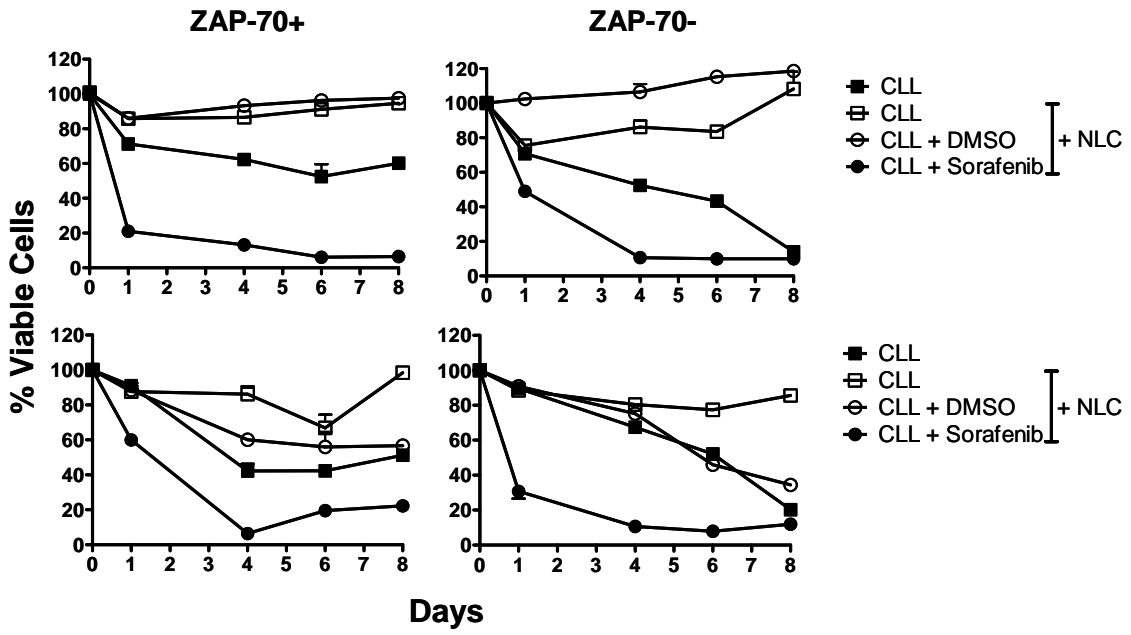

Supplement: blood-2010-04-282400_1.pdf [file blood-2010-04-282400_1.pdf]
